# Supplementary material for: Live-cell imaging of actin dynamics reveals mechanisms of stereocilia length regulation in the inner ear
Source: PubMed Central journal article supplement (PMC4411292; doi:10.1038/ncomms7873), 2015-04-21
Supplement: ncomms7873-s1.pdf [file ncomms7873-s1.pdf]

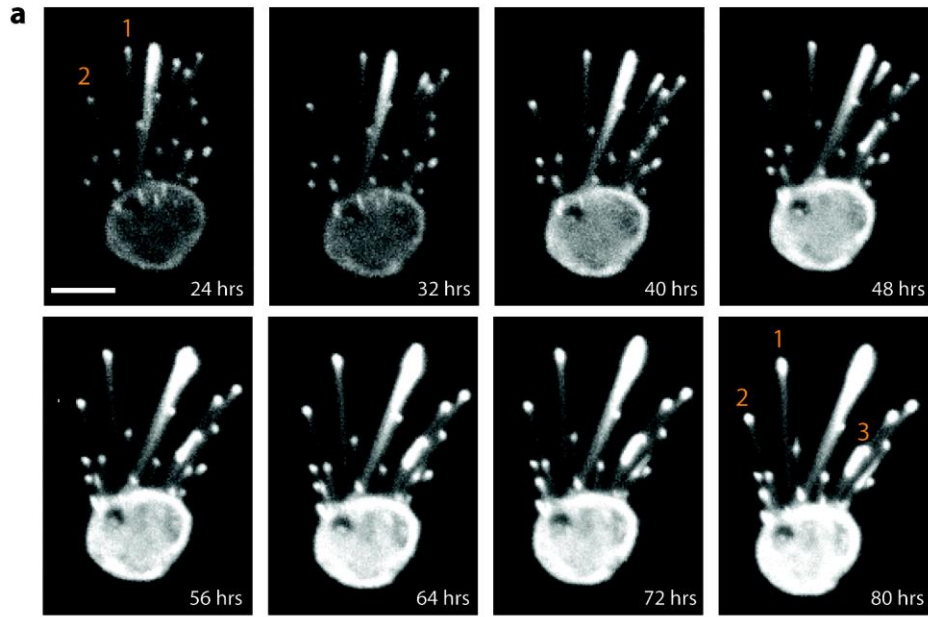

**Supplementary Figure 1 | Images of stereocilia used in Figure 3 without dashed lines**

Scale bar, 5  $\mu\text{m}$ .
